# Supplementary material
Source: Springer Nature journal article supplement (https://www.springermedizin.de/resource/supplementary/12936_2013_3025_MOESM9_ESM.pdf/9544848)
Supplement: MOESM9 [file 9544848]

A9  
A8  
A7  
A6  
A5  
A3  
A2  
A21  
A20  
A1  
A18  
A17  
A16  
A15  
A14  
A13  
A12  
A11  
A10

Ghana RR reference

98 | 19A

0.002
